# Supplementary material
Source: PubMed Central journal article supplement (PMC3585079)
Supplement: supp_M112.421495_jbc.M112.421495-1.pdf [file supp_M112.421495_jbc.M112.421495-1.pdf]

**SUPPLEMENTAL INFORMATION**

**Intracellular trafficking of the K<sub>v</sub>1.3 potassium channel is regulated by the pro-domain of a matrix metalloprotease**

**Hai M. Nguyen<sup>1\*</sup>, Charles A. Galea<sup>2\*</sup>, Galina Schmunk<sup>1</sup>, Brian J. Smith<sup>3</sup>, Robert A. Edwards<sup>4</sup>, Raymond S. Norton<sup>2</sup> and K. George Chandy<sup>1</sup>**

<sup>1</sup>Departments of Physiology and Biophysics, and <sup>4</sup>Pathology, School of Medicine, University of California, Irvine, California

<sup>2</sup>Medicinal Chemistry, Monash Institute of Pharmaceutical Sciences, Monash University, Parkville, Victoria 3052, Australia

<sup>3</sup>Department of Chemistry, La Trobe Institute for Molecular Science, La Trobe University, Melbourne, Victoria 3086, Australia

*Running Title:* MMP23 regulation of potassium channels

**To whom correspondence should be addressed:**

1. Professor K. George Chandy, Dept. of Physiology and Biophysics, 291 Irvine Hall, School of Medicine, University of California Irvine, Irvine, CA 92697. Fax: 949 8243143; E-mail: [gchandy@uci.edu](mailto:gchandy@uci.edu)
2. Professor Ray Norton, Medicinal Chemistry, Monash Institute of Pharmaceutical Sciences, Monash University, Parkville, Victoria 3052, Australia. Fax: +61 3 99039167; Email: [ray.norton@monash.edu](mailto:ray.norton@monash.edu)

**Table S1.** Average  $R_1$ ,  $R_2$  and  $R_1/R_2$  values for MMP23-PD.

| <b>Region</b>                                                           | <b><math>R_1</math><br/>(<math>s^{-1}</math>)</b> | <b><math>R_2</math><br/>(<math>s^{-1}</math>)</b> | <b><math>R_1/R_2</math></b> |
|-------------------------------------------------------------------------|---------------------------------------------------|---------------------------------------------------|-----------------------------|
| <b>MMP23-PD</b>                                                         | $1.16 \pm 0.03$                                   | $10.79 \pm 0.03$                                  | $0.21 \pm 0.02$             |
| <b>Transmembrane domain, <math>\alpha 1</math><br/>(residues 16-40)</b> | $0.95 \pm 0.04$                                   | $17.71 \pm 0.05$                                  | $0.06 \pm 0.01$             |
| <b>C-terminal helix (<math>\alpha 2</math>; residues<br/>45-60)</b>     | $1.16 \pm 0.02$                                   | $11.59 \pm 0.03$                                  | $0.11 \pm 0.01$             |

Longitudinal ( $R_1$ ) and transverse ( $R_2$ )  $^{15}\text{N}$  relaxation rates were obtained at 600 MHz and 30°C for a solution containing 0.7 mM  $^{15}\text{N}$ -labelled MMP23-PD in 20 mM sodium citrate (pH 5.0), 100 mM DPC, 20 mM TCEP, 0.02% (w/v) sodium azide, 95%  $\text{H}_2\text{O}$  and 10%  $^2\text{H}_2\text{O}$ .

|                     |                                                                          |              |
|---------------------|--------------------------------------------------------------------------|--------------|
| MMP23B IgCAM (hu)   | PRTKRLVPEGRNVTERCGQKLLHKKGKVYWKDQEPLEFSYPGYLALGEAHLSTIANAVN-EGTYTCVV     | NP_008914    |
| ROBO4 (Dro)         | PRDMVAVV--GEQFTLECGPPWGHPEPTVSWWKDEKPLALQPGRHVTSGGSLLMARAEKS-DEGTYMCAEAW | 67613        |
| ROBO4 (hu)          | PRDMVAVV--GEQFTLECGPPWGHPEPTVSWWKDGKPLALQPGRHVTSGGSLLMARAEKS-DEGTYMCAAAQ | 88450        |
| ROBO1 (hu)          | ESDVMVVV--GEPAVMECQPPRGHPEPTISWKKDGSPLDDKDERITIRGGKLMITYTRKS-DAGKYVCVAAI | 15023        |
| ROBO3 (Dro)         | PGNVVVAV--GEPAVLECVPPRGHPEPSVSWRKKDARLKEEEGRITIRGGKLMMSHTLKS-DAGMYVCVAQ  | 96MS0        |
| ROBO2 (hu)          | PTDVVVAA--GEPAILCCQPPRGHPEPTIYWKDKVRIIDKEERISIRGGKLMISNTRKS-DAGMYTCV-    | NP_002933    |
| CDON (rat)          | VDEGNTAVIACHLPESHPKAQVRYSVRQEWLEASRDNYLIMPSTGLQIVNASQDEGTYKCAA           | XP_003751100 |
| Brother of CDO (hu) | VDEGNTAVIACHLPESHPKAQVRYSVRQEWLEASRGNLYLIMPSTGLQIVNASQDEGMYKCAA          | NP_150279    |
| Hemicentin (dog)    | VPEGQTAHLTC-NATGHPQPKVMWFKDGRPLTGGDAHHSPPDGLLQVQLQANLSSSGHYSCIA          | XP_548414    |
| Contactin 4 (ZF)    | LVKEGDDVLIIECKPK-MSPREGSISWFKGNDALESRIAIVLESGLRISNVSKS-DAGSYTCVA         | XP_700023    |

**Supplemental Figure S1.** Sequence alignment of the IgCAM domain of MMP23's with ROBO proteins. The C-terminal IgCAM domain of MMP23 exhibits high sequence similarity with the ROBO, CDON and brother of CDO proteins. Identical residues are highlighted in yellow, and conserved residues are highlighted in grey.

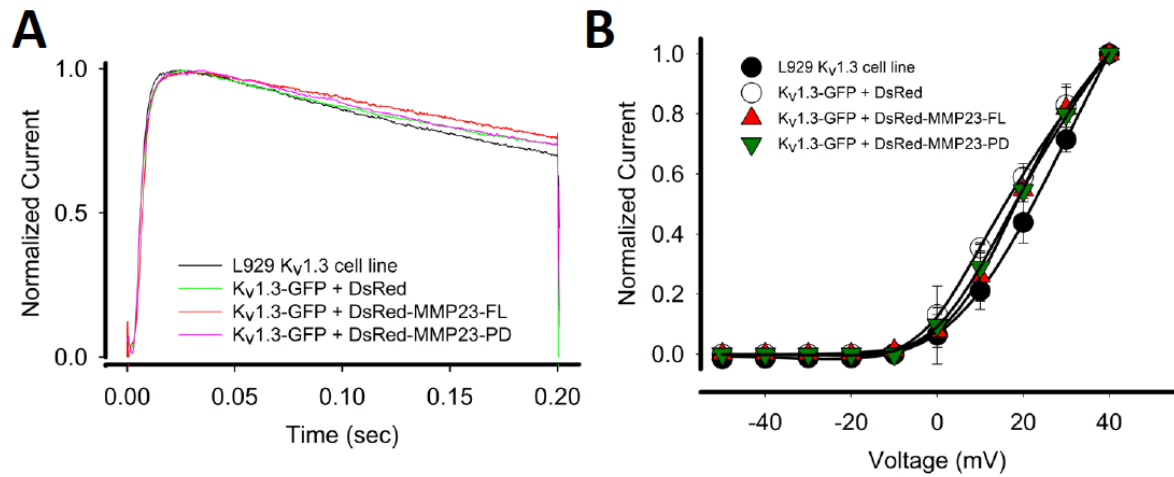

**Supplemental Figure S2.** Biophysical properties of  $K_V1.3$  in cells expressing MMP23-FL or MMP23-PD versus normal  $K_V1.3$ . *A*, averaged current traces elicited by a +40 mV depolarizing pulse for 200 msec during whole-cell patch-clamping recordings. The activation and inactivation of  $K_V1.3$ -GFP were the same in cells co-expressing DsRed-MMP23-FL, DsRed-MMP23-PD or the DsRed vector. GFP-tagged  $K_V1.3$  channels showed no differences compared to those of untagged  $K_V1.3$  stably expressed in the L929 cell line (1). *B*, Current-Voltage relationship of  $K_V1.3$  was the same in cells co-expressing DsRed-MMP23-FL, DsRed-MMP23-PD or the DsRed vector.

|                   |                                                                  |    |
|-------------------|------------------------------------------------------------------|----|
| Rat MMP23-PD1     | MGWRACL RPEASGA-VQGRWLGA VLSGLCLLSALA FLEWLGSP TETAWNAAQGNVDAPDV | 59 |
| Mouse MMP23-PD 1  | MGCRA CLRPEASGA-VQGRWLGA ALSGLCLLSALALLEWLGAPTETAWRAAQGNVDAPNV   | 59 |
| Human MMP23-PD 1  | MGRGARVPSEAPGAGVERRWLGAALVALCLLPALVLLARLGAPAVPAWSAAQGDVAALGL     | 60 |
|                   |                                                                  |    |
| Rat MMP23-PD60    | GGSTP-QVPSLLSMLVTRRRRYTLTPARL                                    | 87 |
| Mouse MMP23-PD 60 | GSSTA-QVPRLLTMSVTRRRRYTLTPARL                                    | 87 |
| Human MMP23-PD61  | SAVPPTRVPGPLA---PRRRRYTLTPARL                                    | 86 |

**Supplemental Figure S3.** Comparison of sequences of rat, mouse and human MMP23-PD. Rat MMP23 is not processed (cleaved) in mammalian cells despite containing the RRRRY furin cleavage site (6).

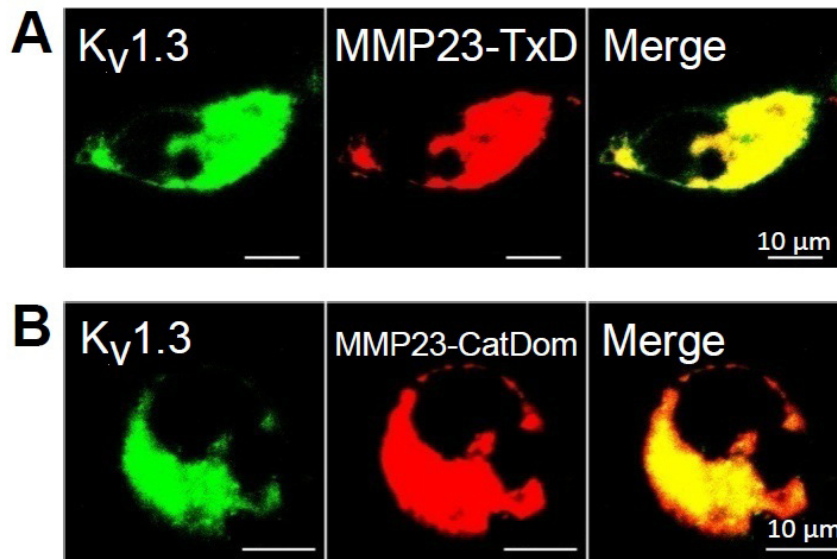

**Supplemental Figure S4.** Co-localization of MMP23-TxD and MMP23-CatDom with K<sub>v</sub>1.3. *A*, confocal images demonstrating that K<sub>v</sub>1.3-GFP co-localizes with DsRed-MMP23-TxD. The MMP23-TxD construct contains the pro-domain, the catalytic domain and the TxD. *B*, confocal images demonstrating that K<sub>v</sub>1.3-GFP co-localizes with DsRed-MMP23-CatDom. The MMP23-CatDom construct contains the pro-domain and the catalytic domain. The deletion constructs are described in the main text and in Fig. 1, B.

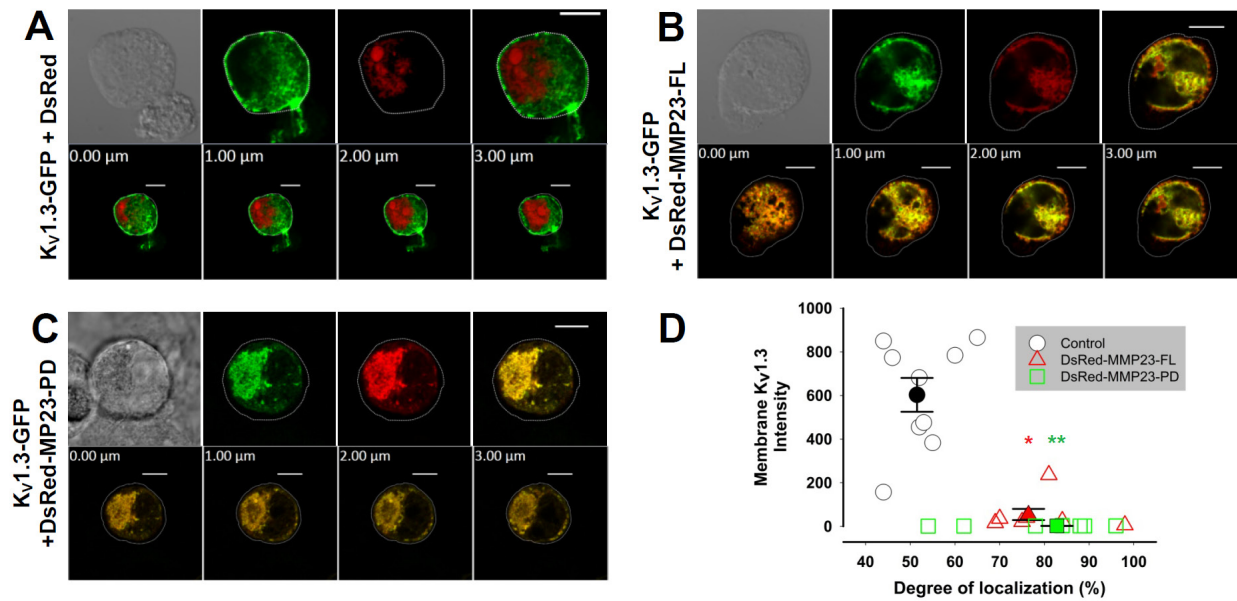

**Supplemental Figure S5.** Quantification of K<sub>v</sub>1.3 on the cell surface in cells expressing the DsRed vector versus DsRed-MMP23-FL or DsRed-MMP23-PD. *A*, Confocal images of K<sub>v</sub>1.3-GFP plus DsRed vector. *B*, K<sub>v</sub>1.3-GFP plus DsRed-MMP23-FL. *C*, K<sub>v</sub>1.3-GFP plus DsRed-MMP23-PD. In each top row, the left panel shows a bright-field image, the second panel shows the K<sub>v</sub>1.3-GFP image, the third panel shows the DsRed image (vector, MMP23-FL, MMP23-PD) and the right panel shows the merged images. *Scale bars* indicate 10 μm in length. Each bottom row shows z-stack images of the respective cell taken at four consecutive planes. *D*, membrane K<sub>v</sub>1.3 plotted against co-localization index between K<sub>v</sub>1.3-GFP and dsRed (vector, MMP23-FL, MMP23-PD). Quantification of membrane K<sub>v</sub>1.3-GFP was calculated from averaged intensity at four different regions of interest (ROI's) at the membrane surface (outlined by dotted-line based on the bright-field image) in each cell. Quantification of co-localization was determined using LSM Zeiss Zen 2011 software ( $n = 10$  cells were imaged for quantification of membrane K<sub>v</sub>1.3-GFP and co-localization). Statistical significance is determined by *Student's t-test* and indicated by  $p$ -values (\*,  $p < 5 \times 10^{-4}$ , \*\*,  $p < 1 \times 10^{-4}$ )

```

      1      10      20      30      40      50      60      70
MGRGARVPSEAPGAGVERRWLGAALVALCLLPALVLLARLGAPAVPAWSAAQGDVAALGLSAVPPTRVPGPLAPRRRR
TMPred      XXXXXXXXXXXXXXXXXXXXXXXX
MEMSAT      XXXXXXXXXXXXXXXXXXXXXXXX
PHDhtm      XXXXXXXXXXXXXXXXXXXXXXXX
DAS         XXXXXXXXXXXXXXXXXXXXXXXX          XXXXXXXX
SPLIT       XXXXXXXXXXXXXXXXXXXXXXXX          XXXXXXXX
OCTOPUS     XXXXXXXXXXXXXXXXXXXXXXXX
TMMOD       XXXXXXXXXXXXXXXXXXXXXXXX
Pred-TMR2   XXXXXXXXXXXXXXXXXXXXXXXX

```

**Supplemental Figure S6.** MMP23-PD trans-membrane domain (TMD). Predicted TMD for MMP23-PD based on various TMD predictors. “X” denotes residues predicted to lie within a TMD. Predictions of trans-membrane regions were obtained using the following programs: TMPred (2), MEMSTAT (3), PHDhtm (4), DAS (5), Pred-TMR2 (6), SPLIT (7), TMMOD (8), and OCTOPUS (9).





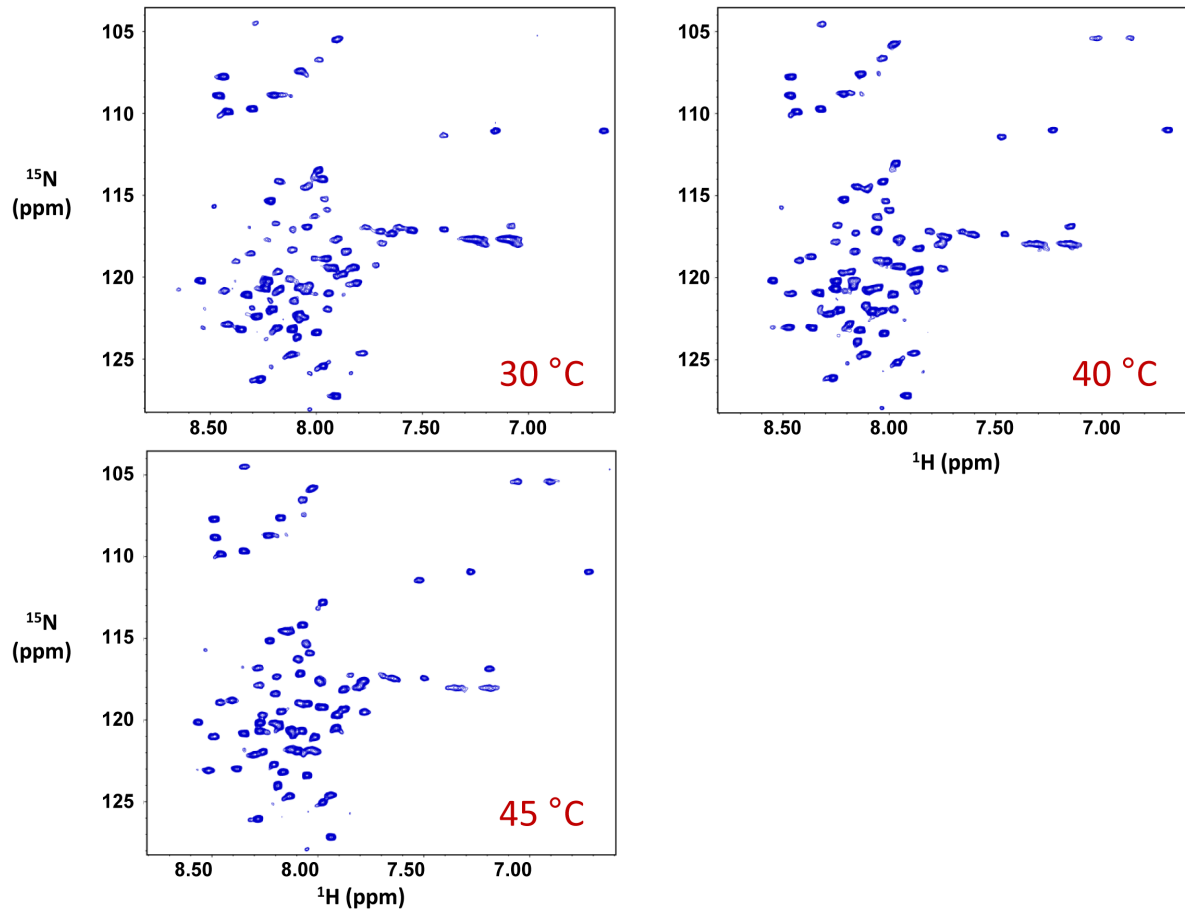

**Supplemental Figure S8.** HSQC spectra of MMP23-PD at various temperatures. The sample contained 0.7 mM MMP23-PD in 20 mM sodium citrate buffer (pH 5.0), 100 mM DPC, 20 mM TCEP, 0.02%  $\text{NaN}_3$  and 10%  $^2\text{H}_2\text{O}$ . Spectra were acquired on a Varian Inova 600 MHz spectrometer at the indicated temperatures.

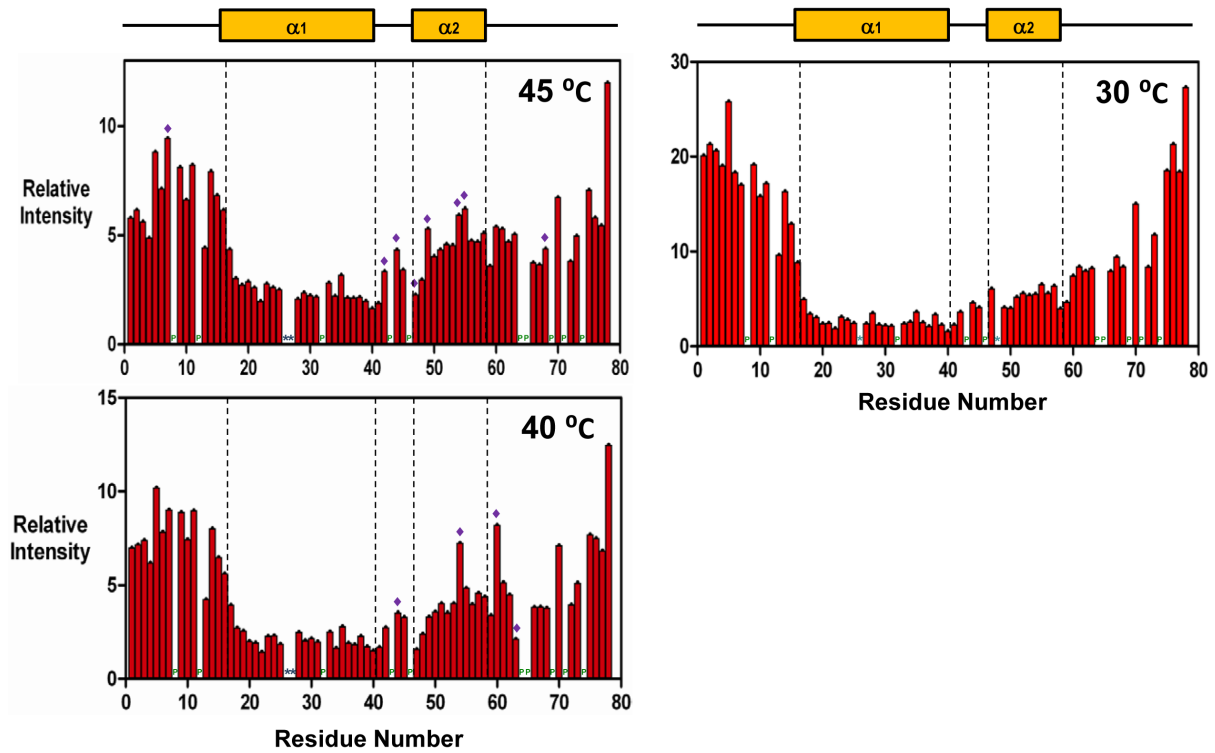

**Supplemental Figure S9.** Relative cross-peak intensities in [ $^1\text{H}$ - $^{15}\text{N}$ ] HSQC spectra of MMP23-PD at 30, 40 and 45°C. The secondary structure for MMP23-PD is shown at the top. Overlapped peaks are denoted with a purple diamond. Proline residues are denoted with a “P” and residues for which no data were available an asterisk. Note that cross-peak intensities are more uniform at the higher temperatures.



## REFERENCES

1. Grissmer, S., Nguyen, A. N., Aiyar, J., Hanson, D. C., Mather, R. J., Gutman, G. A., Karmilowicz, M. J., Auperin, D. D., and Chandy, K. G. (1994) Pharmacological characterization of five cloned voltage-gated K<sup>+</sup> channels, types Kv1.1, 1.2, 1.3, 1.5, and 3.1, stably expressed in mammalian cell lines *Mol. Pharmacol.* **45**, 1227-1234
2. Hofmann K and Stoffel W (1993) TMbase - A database of membrane spanning proteins segments *Biol Chem Hoppe-Seyler* **374**, 166
3. Jones, D. T., Taylor, W. R., and Thornton, J. M. (1994) A model recognition approach to the prediction of all-helical membrane protein structure and topology *Biochemistry* **33**, 3038-3049
4. Rost, B., Casadio, R., Fariselli, P., and Sander, C. (1995) Transmembrane helices predicted at 95% accuracy *Protein Sci.* **4**, 521-533
5. Cserzo, M., Wallin, E., Simon, I., von, H. G., and Elofsson, A. (1997) Prediction of transmembrane alpha-helices in prokaryotic membrane proteins: the dense alignment surface method *Protein Eng* **10**, 673-676
6. Pasquier, C. and Hamodrakas, S. J. (1999) An hierarchical artificial neural network system for the classification of transmembrane proteins *Protein Eng* **12**, 631-634
7. Juretic, D., Zoranic, L., and Zucic, D. (2002) Basic charge clusters and predictions of membrane protein topology *J. Chem Inf. Comput. Sci.* **42**, 620-632
8. Kahsay, R. Y., Gao, G., and Liao, L. (2005) An improved hidden Markov model for transmembrane protein detection and topology prediction and its applications to complete genomes *Bioinformatics.* **21**, 1853-1858
9. Viklund, H. and Elofsson, A. (2008) OCTOPUS: improving topology prediction by two-track ANN-based preference scores and an extended topological grammar *Bioinformatics.* **24**, 1662-1668
10. Cole, C., Barber, J., and Barton GJ (2008) The Jpred 3 secondary structure prediction server *Nucleic Acids Res* **36**, 197-201
11. Rost, B., Yachdav, G., and Liu, J. (2004) The PredictProtein server *Nucleic Acids Res.* **32**, W321-W326
12. Lin, K., Simossis, V. A., Taylor, W. R., and Heringa, J. (2005) A simple and fast secondary structure prediction method using hidden neural networks *Bioinformatics.* **21**, 152-159
13. McGuffin, L. J., Bryson, K., and Jones, D. T. (2000) The PSIPRED protein structure prediction server *Bioinformatics.* **16**, 404-405
14. Pollastri, G., Przybylski, D., Rost, B., and Baldi, P. (2002) Improving the prediction of protein secondary structure in three and eight classes using recurrent neural networks and profiles *Proteins* **47**, 228-235
15. Thompson, J. D., Higgins, D. G., and Gibson, T. J. (1994) CLUSTAL W: improving the sensitivity of progressive multiple sequence alignment through sequence weighting, position-specific gap penalties and weight matrix choice *Nucleic Acids Res* **22**, 4673-4680
